# Supplementary figures and images for: Relevance of CYP2D6 Gene Variants in Population Genetic Differentiation
Source: MDPI journal article supplement (doi:10.3390/pharmaceutics14112481), 2022-11-16

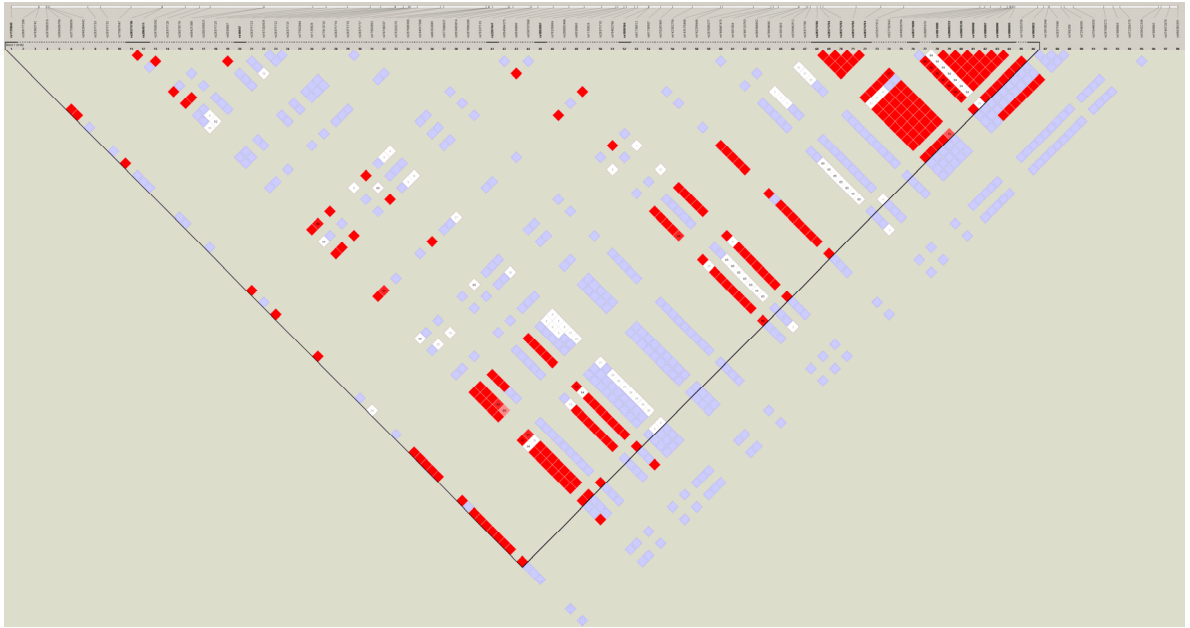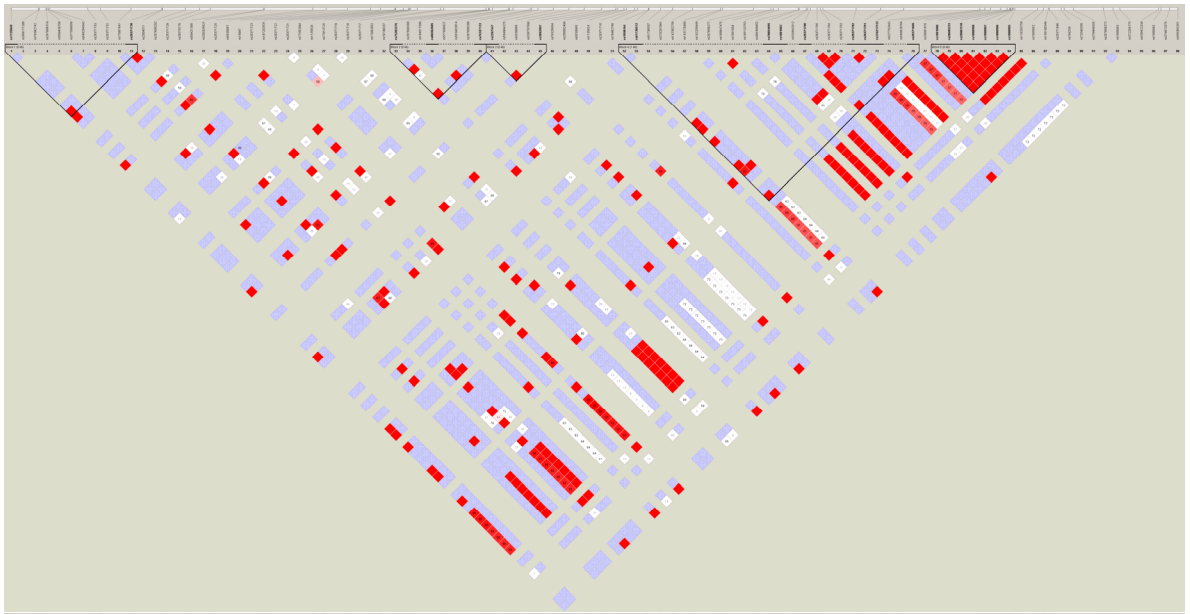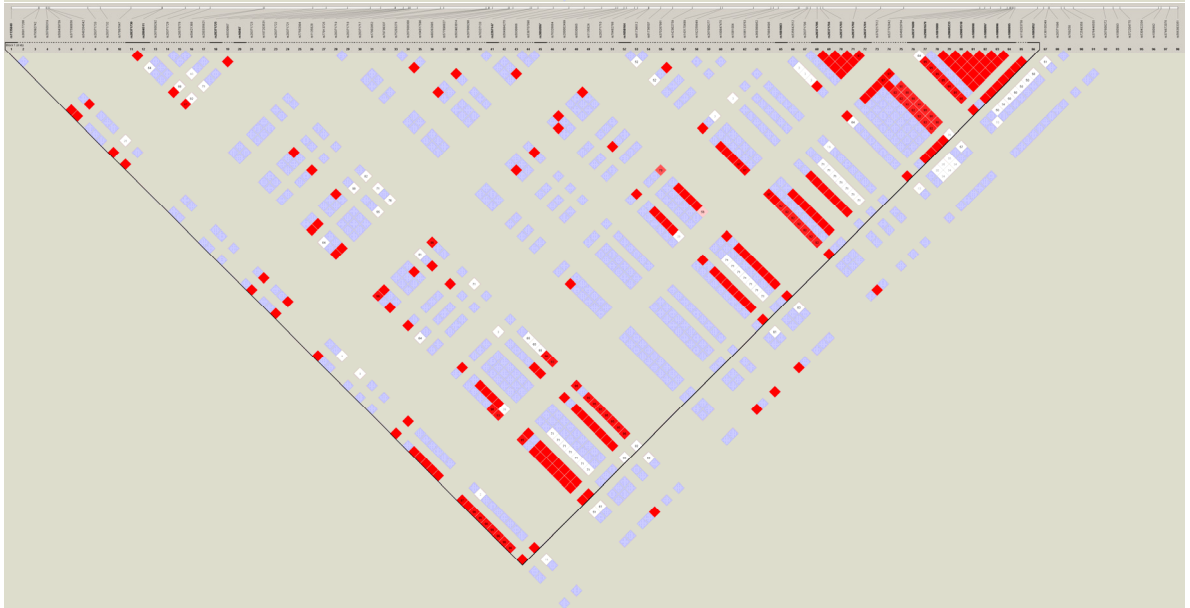

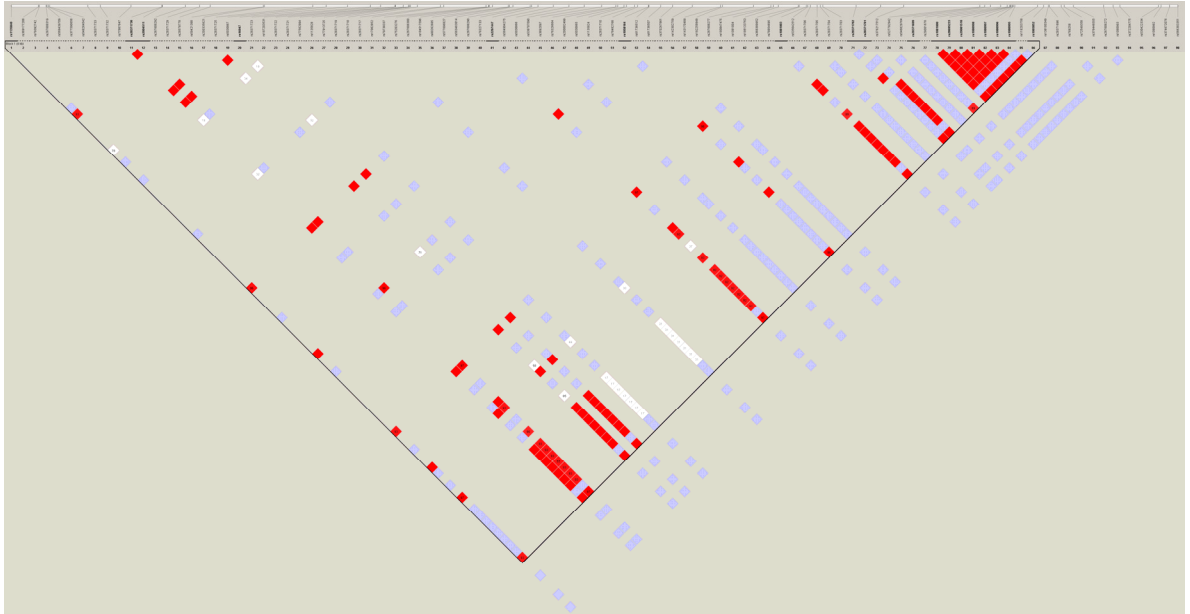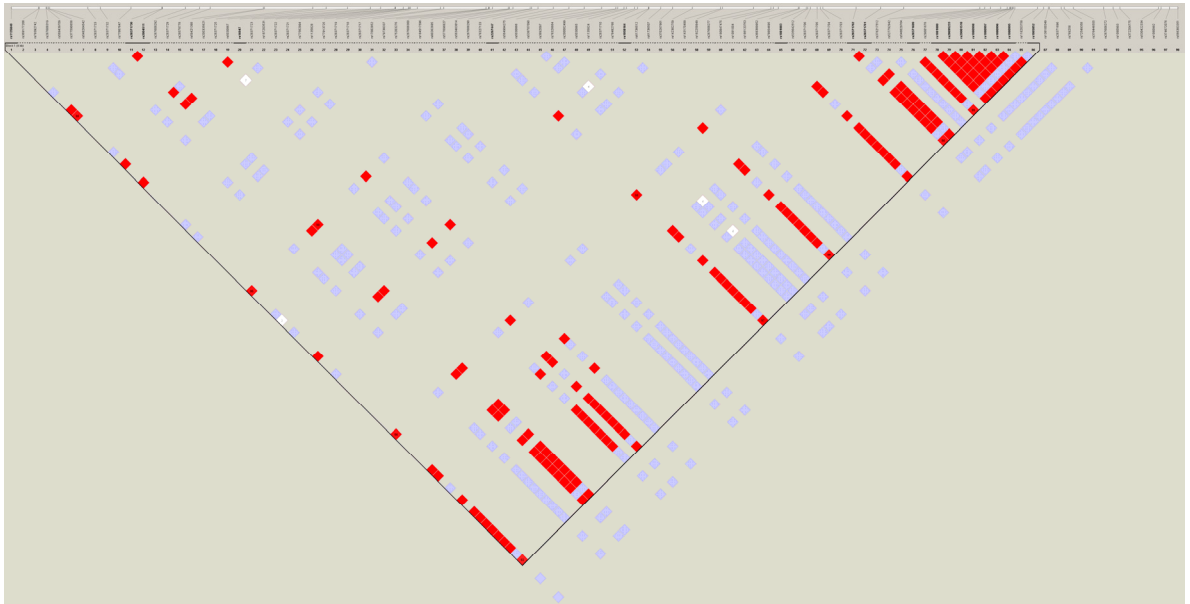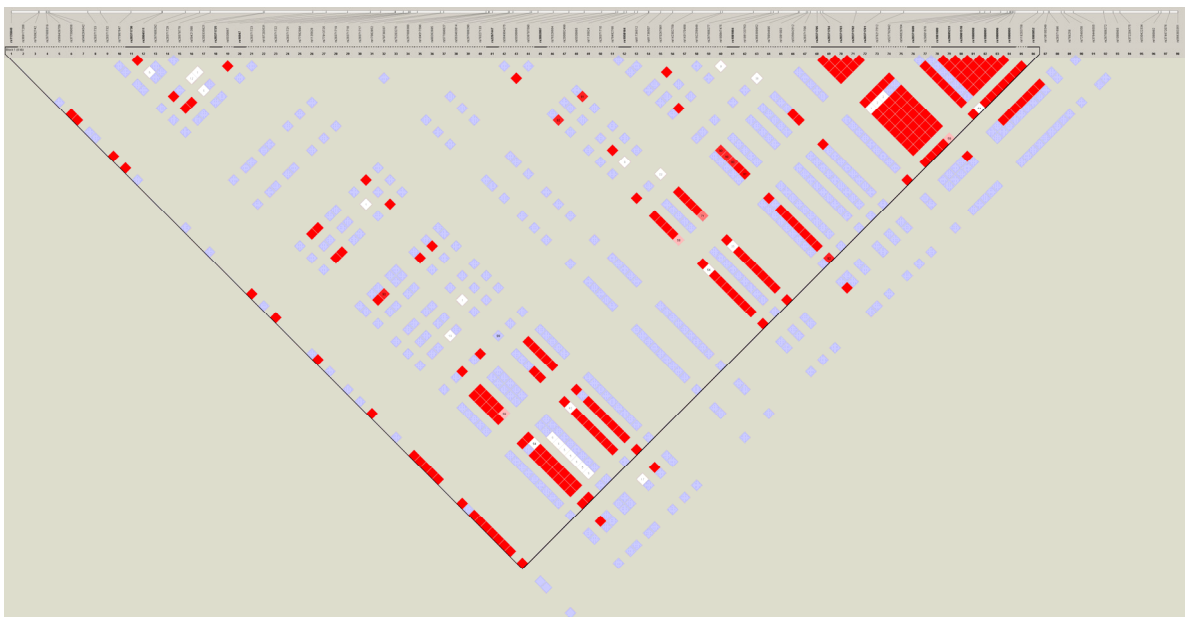

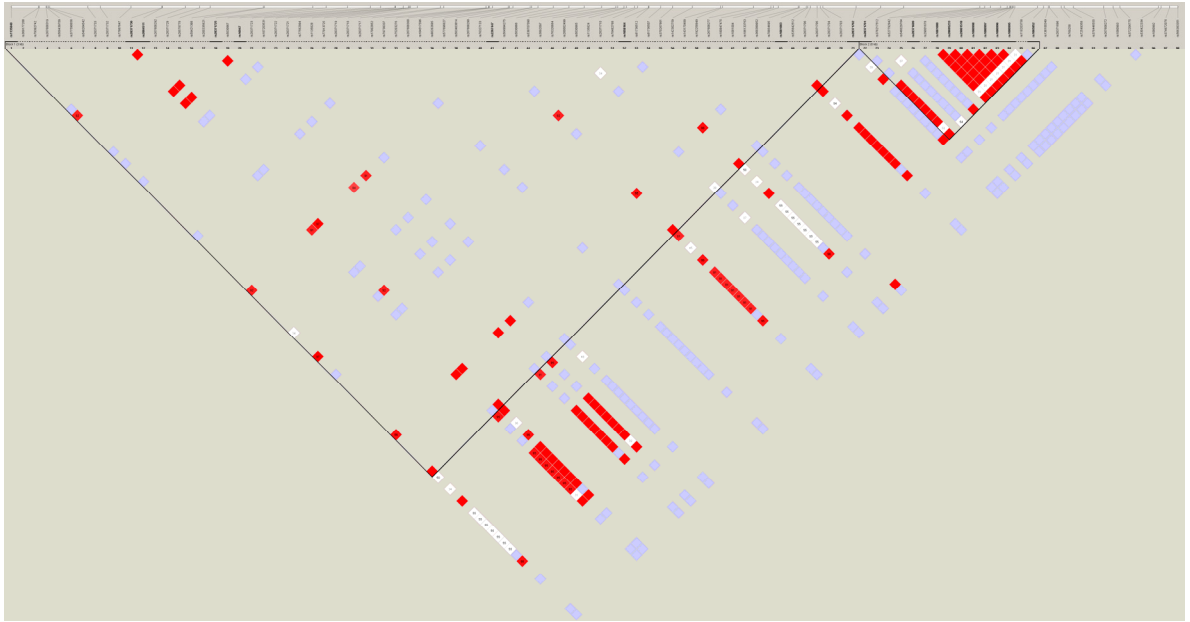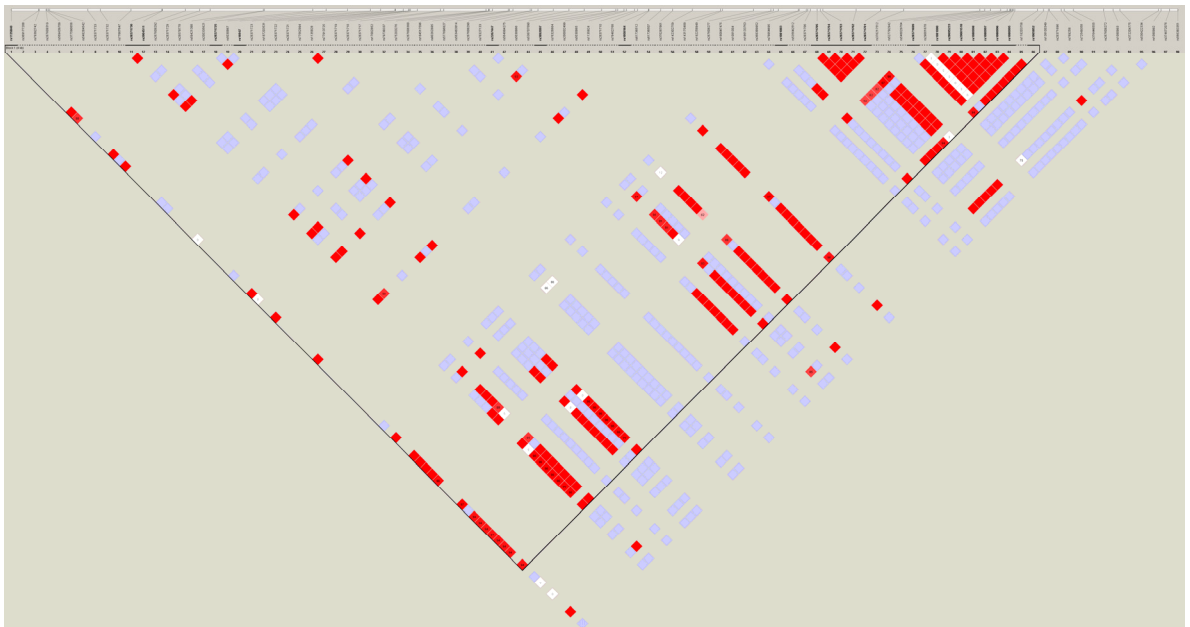

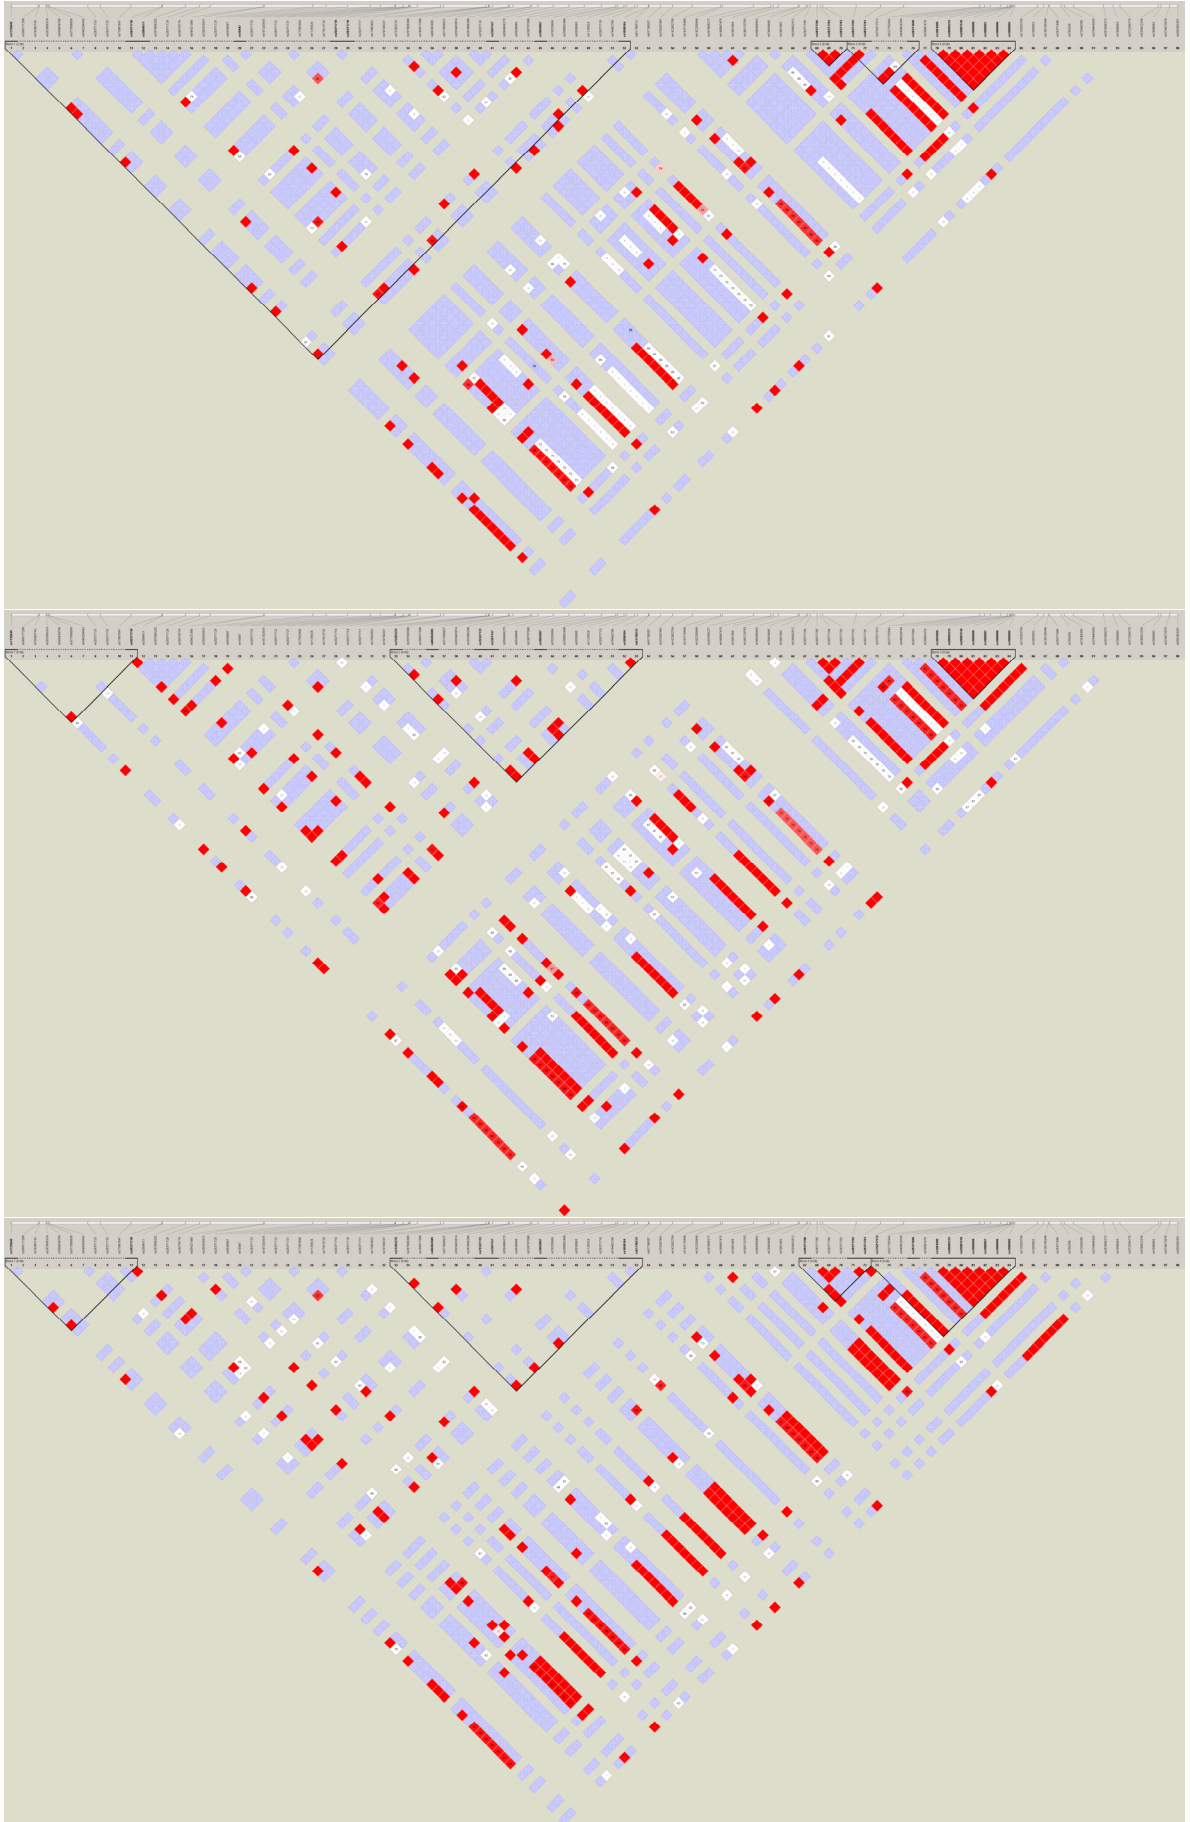

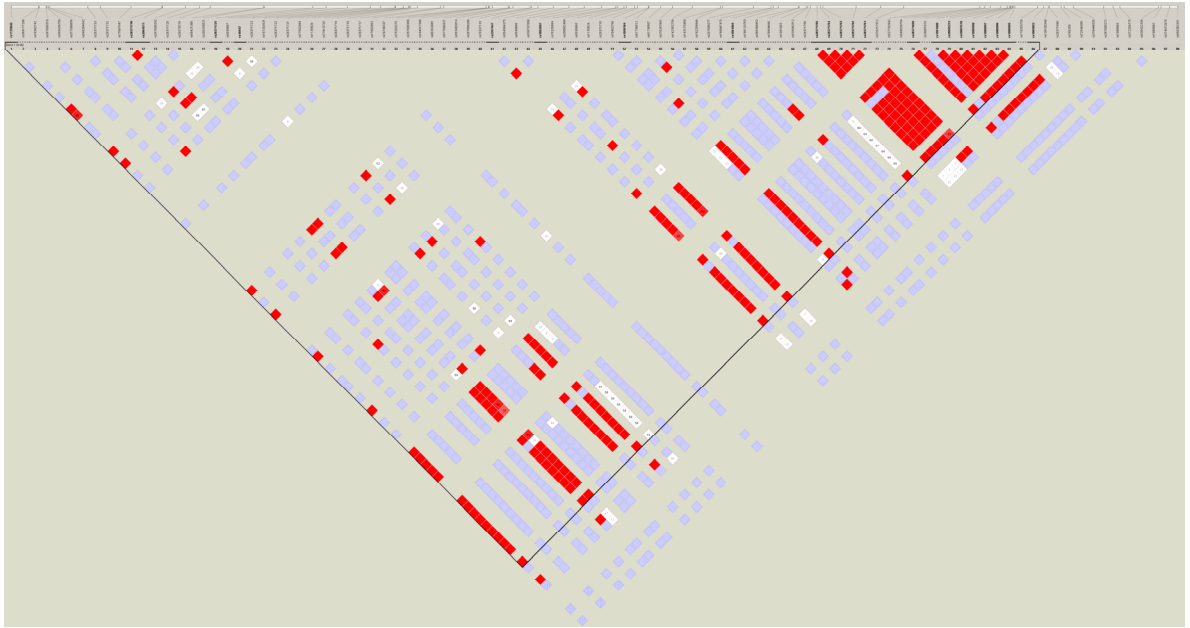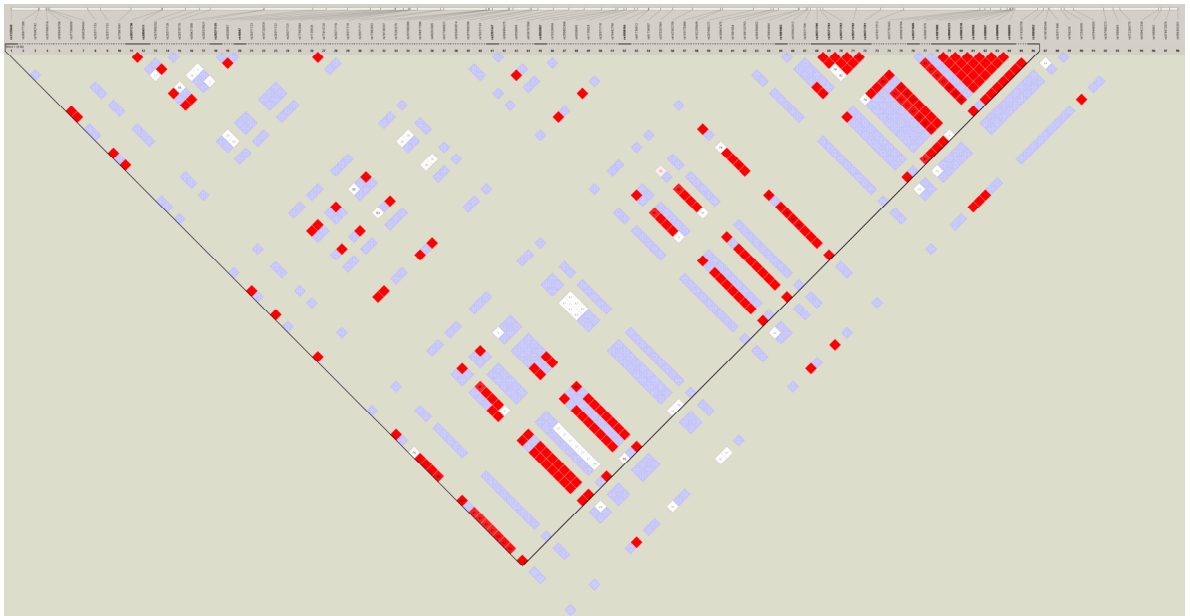

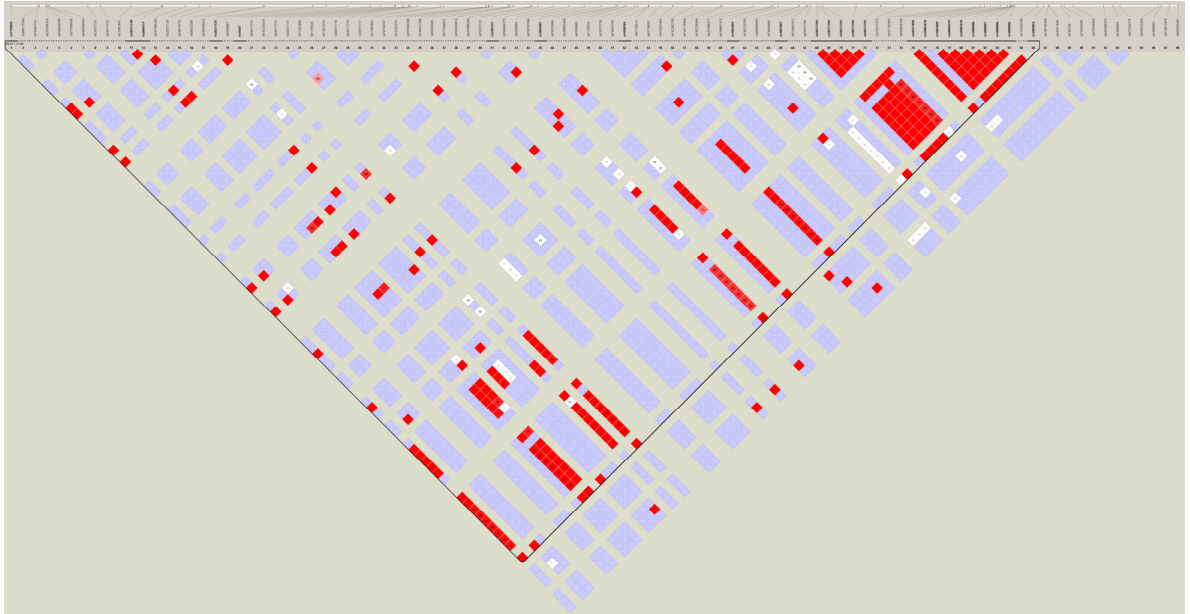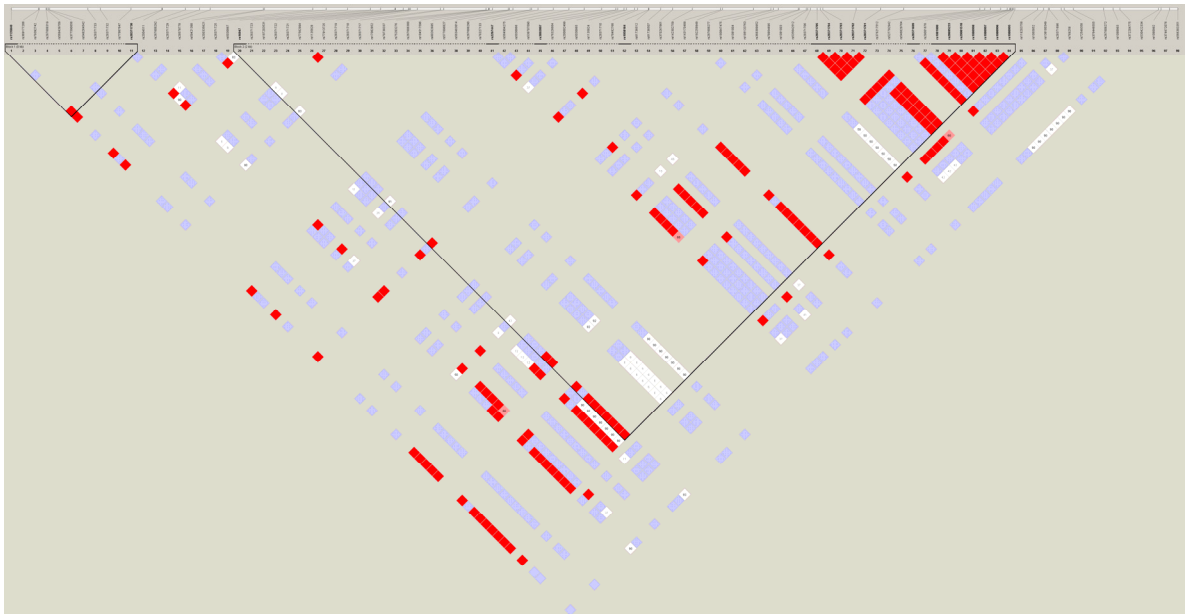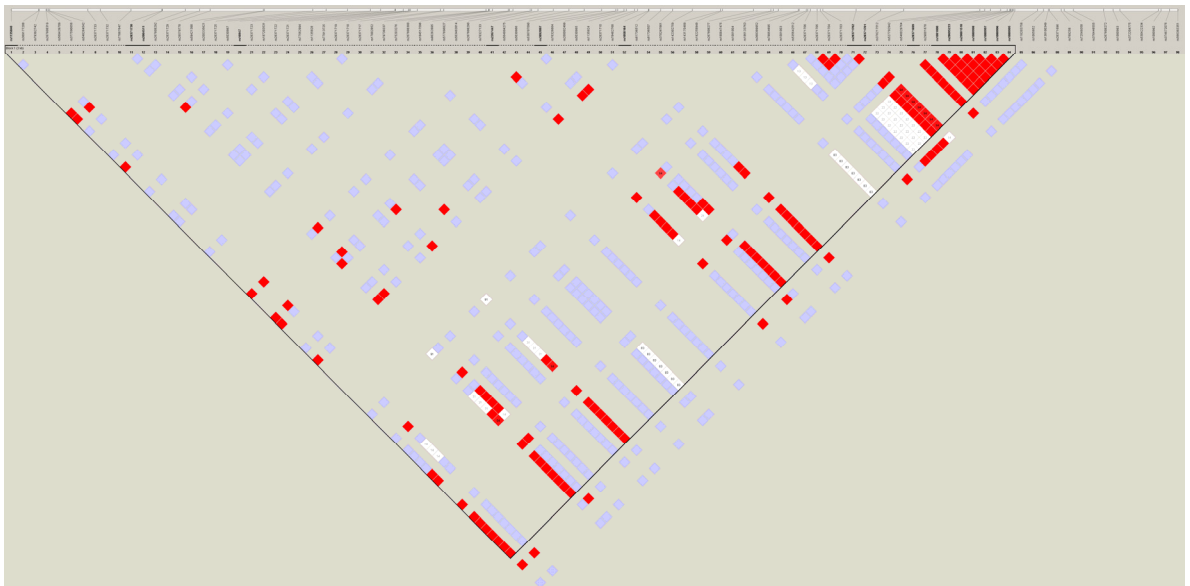

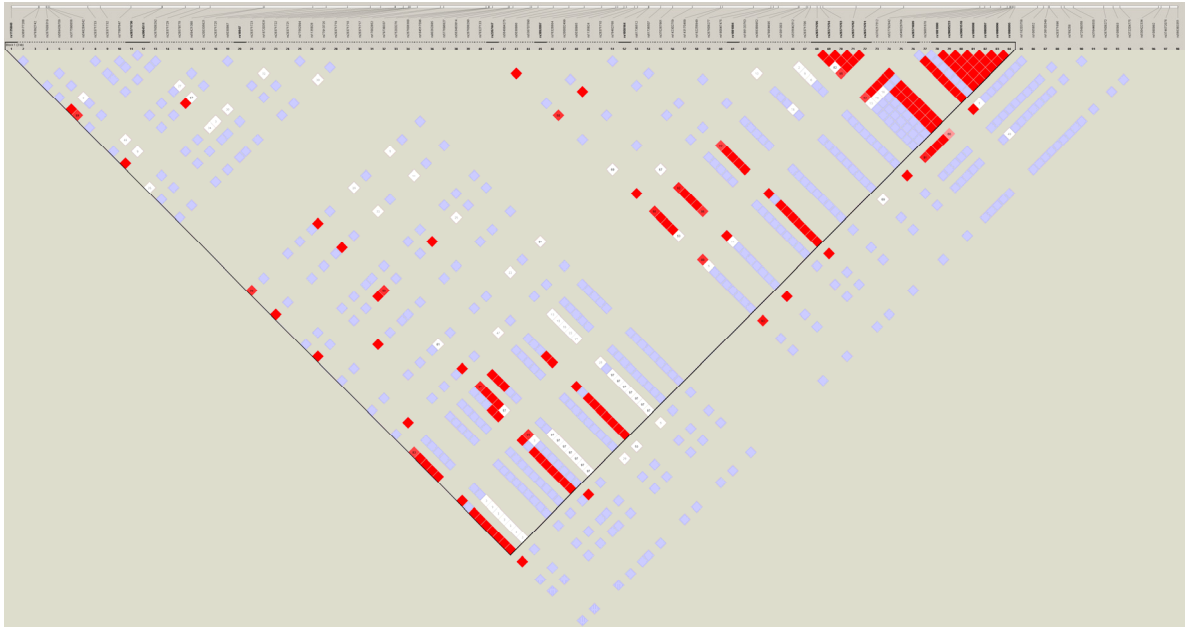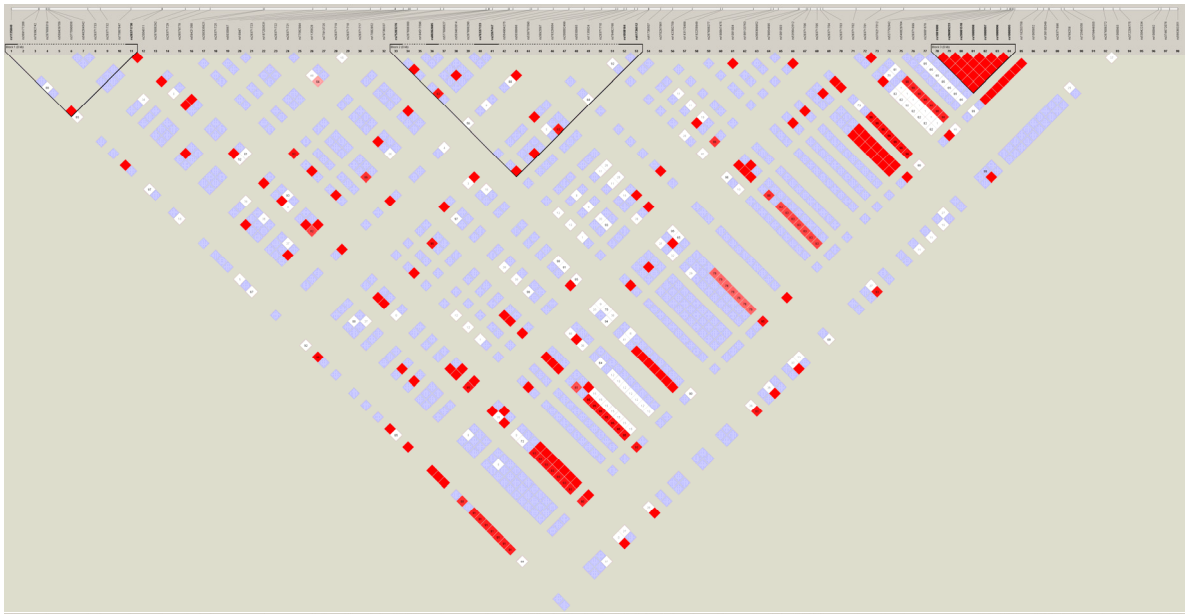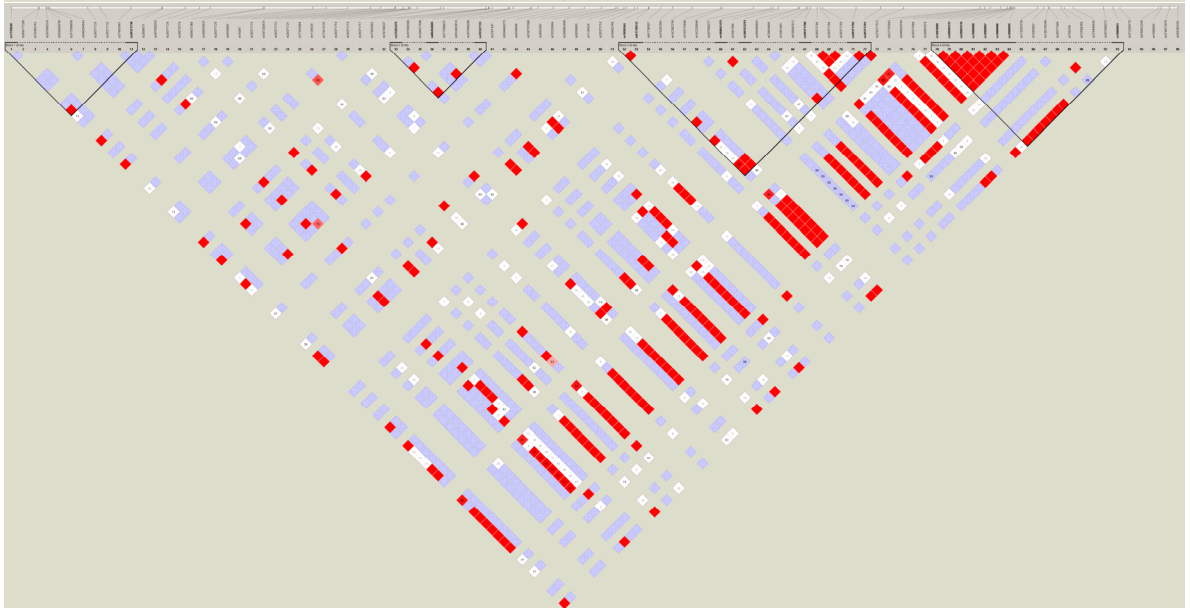

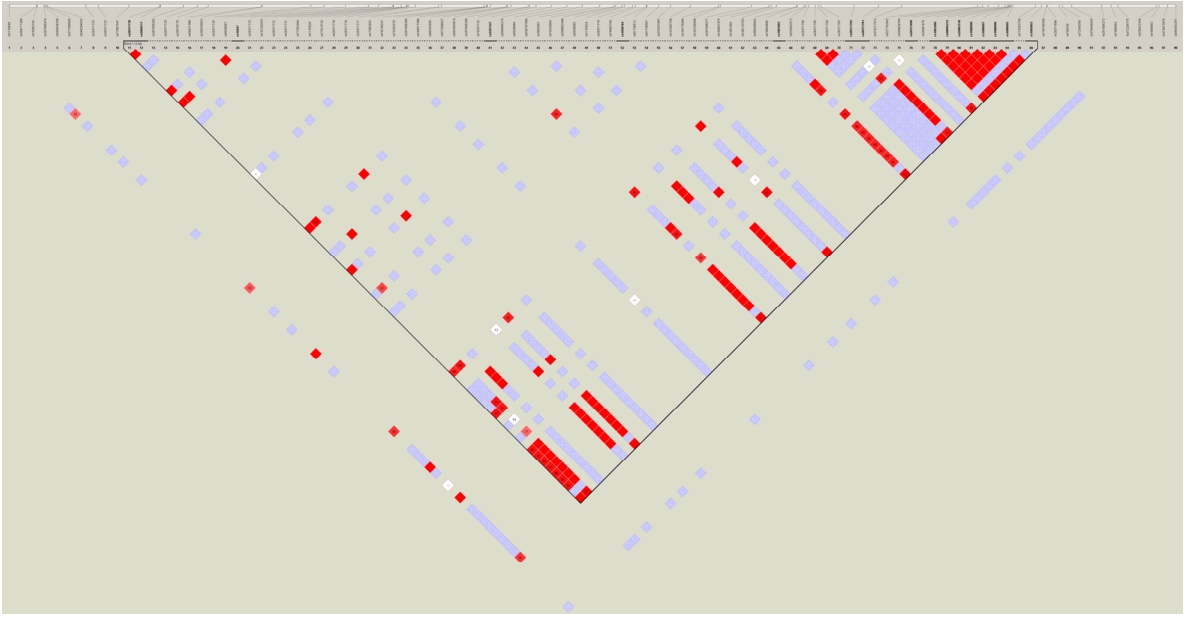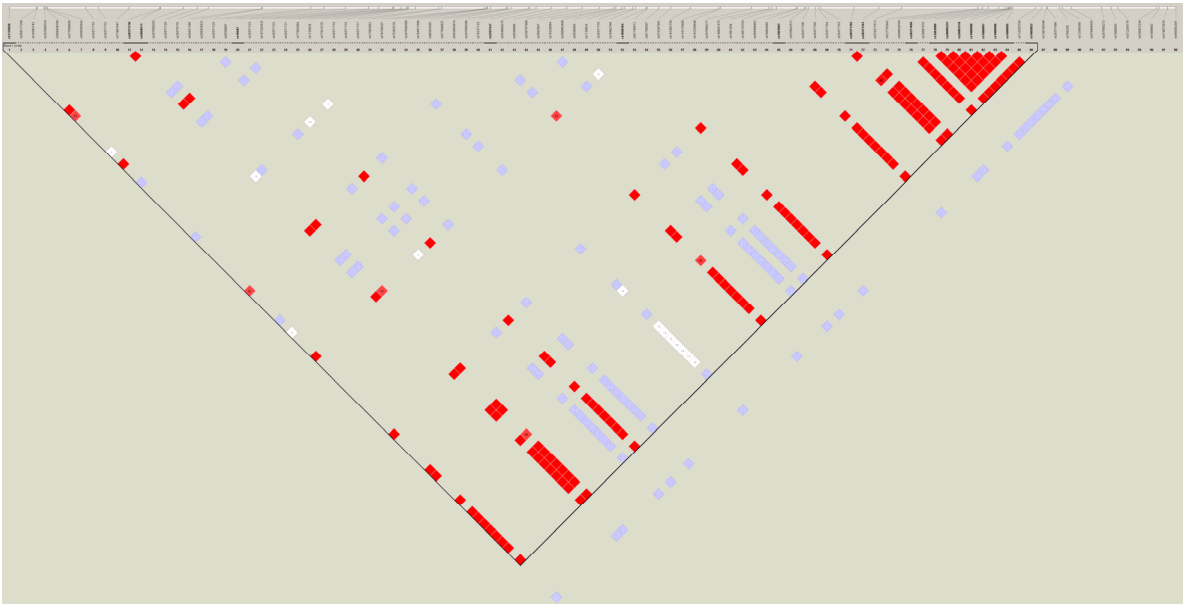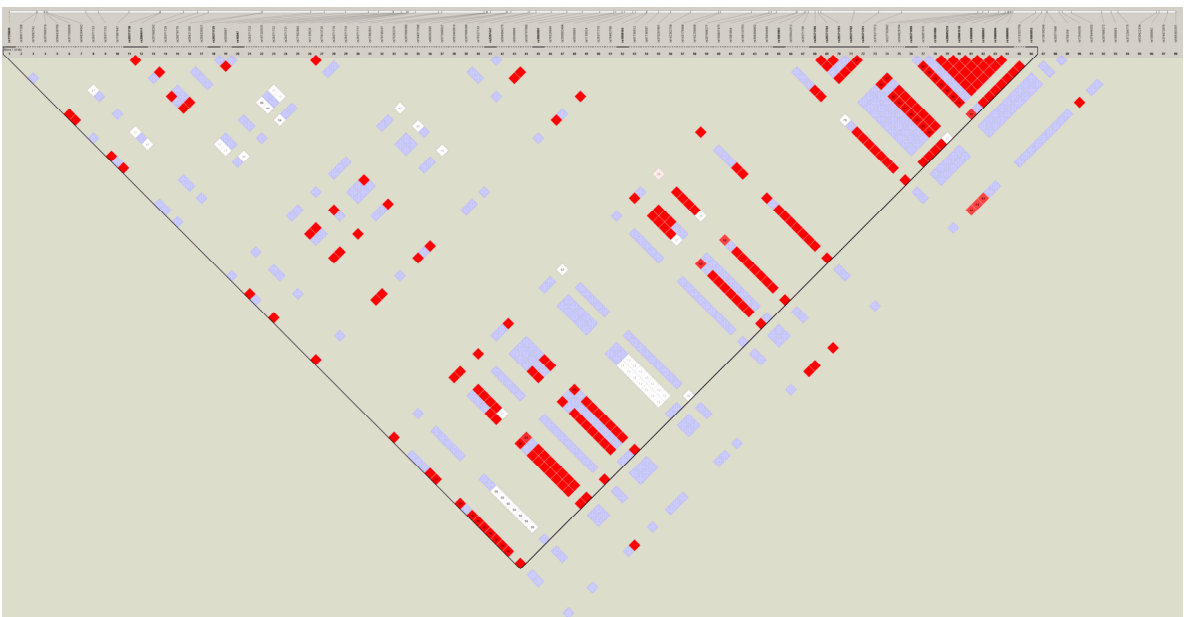

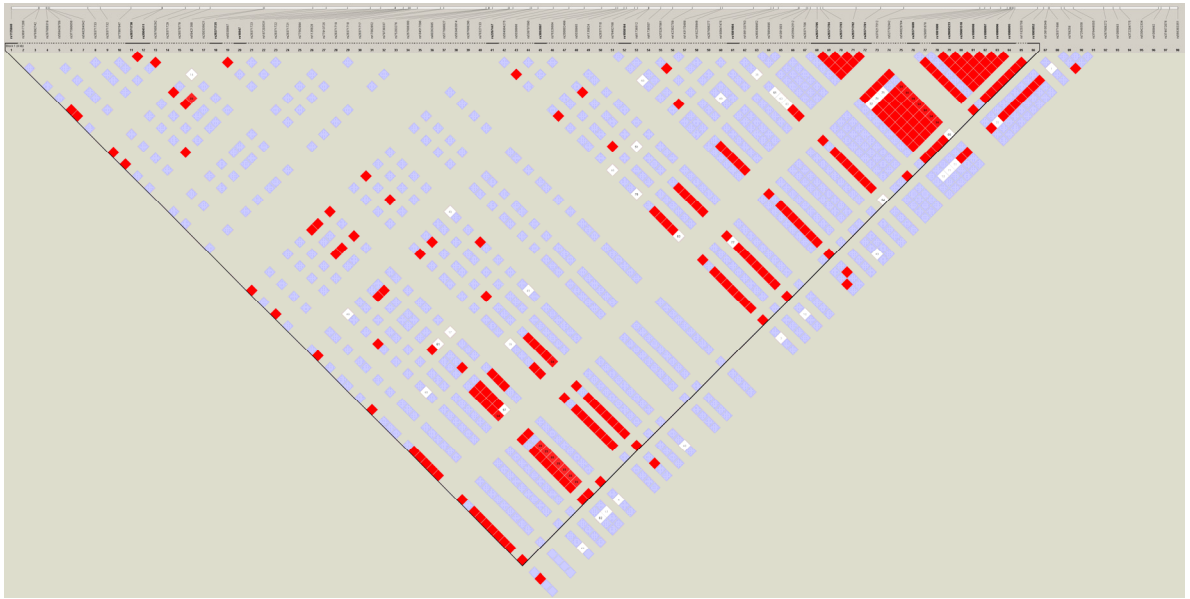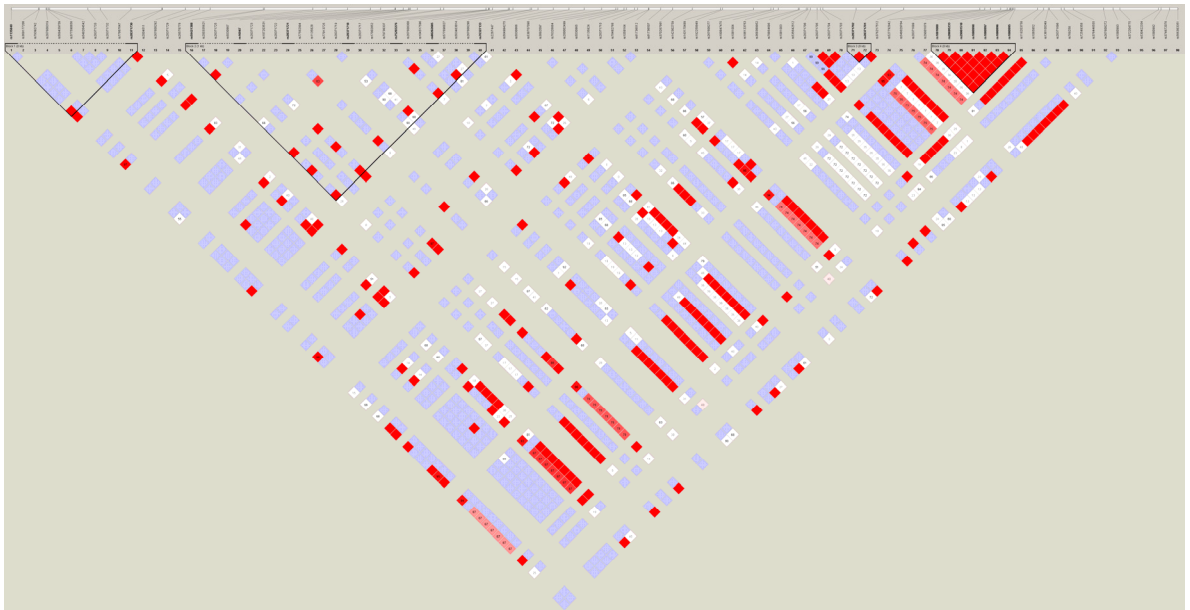

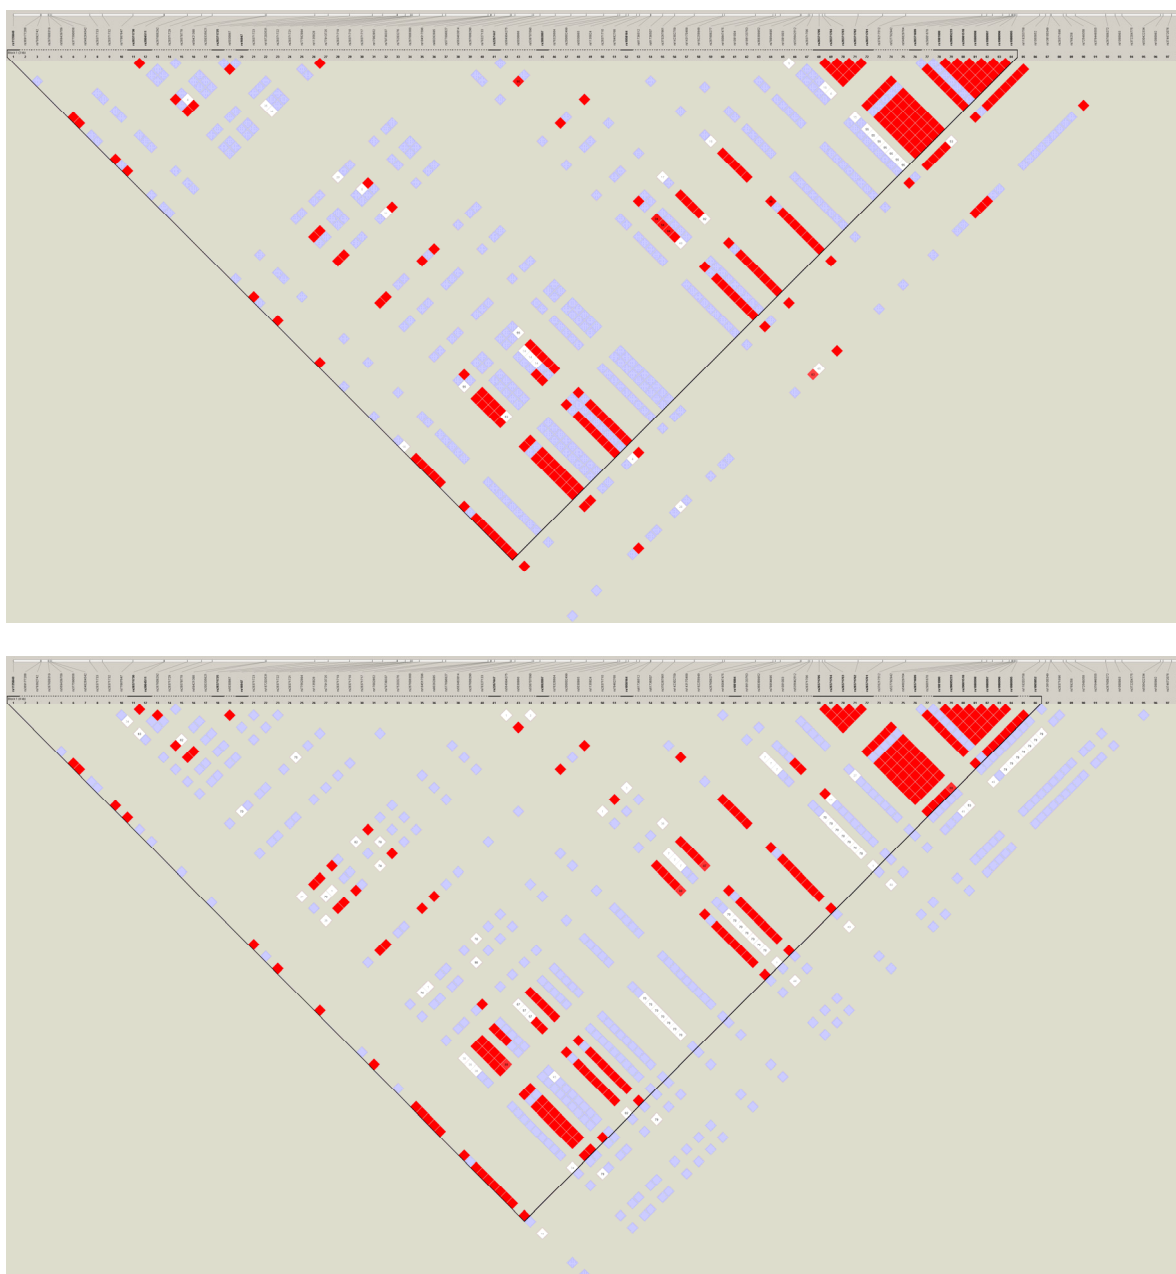

**Figure S1:** Haplotype blocks for 26 world populations.

Supplement: s1 [file s1]
